# Supplementary material for: 3DIV: A 3D-genome Interaction Viewer and database
Source: Oxford University Press journal article supplement (doi:10.1093/nar/gkx1017), 2017-10-27
Supplement: gkx1017_supp.zip [file gkx1017_supp.zip]

Archive with 2 entries (2 files):
- nar-02326-data-e-2017-File007.xlsx
- Yang_et_al_SupplementaryTextFigures.pdf
