# Supplementary material for: 3DIV: A 3D-genome Interaction Viewer and database
Source: Oxford University Press journal article supplement (doi:10.1093/nar/gkx1017), 2017-10-27
Supplement: gkx1017_supp.zip [file gkx1017_supp.zip › nar-02326-data-e-2017-File007.xlsx]

## Sheet: Table S1 Hi-C seq Statistics
Sample Name	List of Experiments	experiment count	raw read-pair count	properly aligned read-pair count	valid cis read-pair count	average number of cis interactions for 40kb bin.
Adrenal gland	GSM2322539	1	212977870	102510217	28497409	375.371
Aorta	GSM1419084	1	777069820	322739411	67216913	885.388
Bladder	GSM2322540 GSM2322541	2	539058463	187854318	48538727	639.357
Dorsolateral Prefrontal Cortex	GSM2322542	1	186498461	86888547	32796588	432
Hippocampus	GSM2322543	1	212040044	109092968	36886070	485.867
Lung	GSM2322544 GSM2322545	2	1003815486	299508696	65813597	866.904
Liver	GSM1419086	1	949121479	481638495	97037129	1278.18
Left Ventricle	GSM1419085	1	352403963	120288986	27084958	356.766
Ovary	GSM2322546	1	226751982	106419640	25267283	332.823
Pancreas	GSM2322547 GSM2322548 GSM2322549 GSM2322550	4	365907124	127817013	38203691	503.223
Psoas	GSM2322551 GSM2322552 GSM2322553	3	334407202	108696934	25598765	337.19
Right Ventricle	GSM2322554	1	746798299	239272048	58683667	772.988
Small Bowel	GSM2322555	1	205647817	106453573	25752915	339.22
Spleen	GSM2322556 GSM2322557	2	434667398	190758119	38189583	503.037
Thymus	GSM1419083	1	794098314	572650460	134150971	1767.05
H1 Embroynic Stem Cell	GSM1267196 GSM1267197	2	2425141766	1016041716	316035356	4162.85
H1 Mesendoderm Cell	GSM1267198 GSM1267199	2	1459544582	803996541	335857214	4423.95
H1 Mesenchymal Stem Cell	GSM1267200 GSM1267201	2	973402930	565223990	352846212	4647.73
H1 Neuronal Progenitor Cell	GSM1267202 GSM1267203	2	1531163120	584165770	91433355	1204.37
H1 Trophectoderm Cell	GSM1267204 GSM1267205	2	1274418605	659060494	166889013	2198.28
H9 Embryonic Stem Cell	GSM2309023	1	312782126	224547766	76844696	1012.21
H9-derived Neuro-Ectodermal Cell	GSM2309024	1	280384750	201473661	69625454	917.114
GM12878 Lymphoblastoid Cell Line	GSM1181867 GSM1181868	2	826414879	657212942	144751832	1906.69
IMR90 fibroblast control	GSM1055800 GSM1055801 GSM1154021 GSM1154022 GSM1154023 GSM1154024	6	2430527656	1077354379	251996087	3319.32
IMR90 fibroblast flbopiridol treated	GSM1055804	1	279573023	155477894	71128673	936.914
IMR90 fibroblast TNF-α treated	GSM1055802 GSM1055803 GSM1154025 GSM1154026 GSM1154027 GSM1154028	6	2891265840	1047616319	345567170	4551.85
fibroblast(CRL-2522) control	GSM2142399	1	154072731	109808489	24763961	326.194
fibroblast(CRL-2522) dexamethasone 00h	GSM2142400	1	168986449	131711946	32602940	429.449
fibroblast(CRL-2522) dexamethasone 08h	GSM2142401	1	104398997	85551193	22136590	291.586
fibroblast(CRL-2522) dexamethasone 16h	GSM2142402	1	92150515	75436108	19528094	257.226
fibroblast(CRL-2522) dexamethasone 24h	GSM2142403	1	88080064	68326876	18825064	247.966
fibroblast(CRL-2522) dexamethasone 32h	GSM2142404	1	82843277	67571665	18054523	237.816
fibroblast(CRL-2522) dexamethasone 40h	GSM2142405	1	116442811	97983237	23836729	313.98
fibroblast(CRL-2522) dexamethasone 48h	GSM2142406	1	112361368	93569756	23189952	305.461
fibroblast(CRL-2522) dexamethasone 56h	GSM2142407	1	134746108	109663382	28392117	373.984
A549 00h 100 nM dexamethasone	GSM2437783 GSM2437784 GSM2437785 GSM2437786 GSM2437787 GSM2437788 GSM2437789 GSM2437790	8	2418001989	2205956013	353731704	4659.39
A549 01h 100 nM dexamethasone	GSM2437749 GSM2437750 GSM2437751 GSM2437752 GSM2437753 GSM2437754 GSM2437755	7	2334022843	1613418481	270605081	3564.44
A549 04h 100 nM dexamethasone	GSM2437783 GSM2437784 GSM2437785 GSM2437786 GSM2437787 GSM2437788 GSM2437789 GSM2437790	8	2316094376	1897101224	324448157	4273.67
A549 08h 100 nM dexamethasone	GSM2437857 GSM2437858 GSM2437859 GSM2437860 GSM2437861 GSM2437862 GSM2437863 GSM2437864	8	2140207414	1974781327	313868478	4134.31
A549 12h 100 nM dexamethasone	GSM2437806 GSM2437807 GSM2437808 GSM2437809 GSM2437810 GSM2437811 GSM2437812 GSM2437813	8	2320536484	1761086339	294411994	3878.03
LNCap prostate cancer cell line, BglII	GSM1902607 GSM1902608 GSM1902609 GSM1902610 GSM1902611 GSM1902612 GSM1902613 GSM1902614	8	889621669	441755701	18270376	240.659
PC3 prostate cancer cell line, BglII	GSM1902605 GSM1902606	2	171640478	119064427	21180161	278.987
PrEC normal Prostate epithelial cell, BglII	GSM1902602 GSM1902603 GSM1902604	3	535415703	328547041	34224041	450.803
GM12878, dilution HiC, HindIII	GSM1551583 GSM1551584 GSM1551586 GSM1551651	4	6345962161	3785755366	852980269	11235.5
GM12878, dilution HiC, NcoI	GSM1551585 GSM1551650 GSM1551652 GSM1551655 GSM1551656 GSM1551657 GSM1551658 GSM1551659 GSM1551660 GSM1551661 GSM1551662 GSM1551663 GSM1551664 GSM1551666 GSM1551667 GSM1551670 GSM1551671 GSM1551675 GSM1551676 GSM1551677 GSM1551679 GSM1551680 GSM1551681	23	706101508	590082959	244598540	3221.88
GM12878, in-situ HiC, DpnII	GSM1551742 GSM1551744 GSM1551745 GSM1551590 GSM1551591 GSM1551587 GSM1551588 GSM1551589 GSM1551747 GSM1551748	10	572303567	469969009	386840706	5095.51
GM12878, in-situ HiC, NcoI	GSM1551572 GSM1551573 GSM1551577 GSM1551578 GSM1551598	5	36083399	31669542	13911439	183.243
GM12878, in-situ MboI	GSM1551552 GSM1551553 GSM1551554 GSM1551555 GSM1551556 GSM1551557 GSM1551558 GSM1551559 GSM1551560 GSM1551561 GSM1551562 GSM1551563 GSM1551564 GSM1551565 GSM1551566 GSM1551567 GSM1551569 GSM1551570 GSM1551571 GSM1551572 GSM1551573 GSM1551574 GSM1551575 GSM1551576 GSM1551577 GSM1551578 GSM1551597 GSM1551598 GSM1551682 GSM1551695 GSM1551696 GSM1551697 GSM1551699 GSM1551700 GSM1551701 GSM1551702 GSM…	76	5176038004	4746716353	955662817	12588.1
HMEC, in-situ MboI	GSM1551607 GSM1551608 GSM1551609 GSM1551610 GSM1551611 GSM1551612	6	538392678	413219453	168568946	2220.41
HUVEC, in-situ MboI	GSM1551629 GSM1551630 GSM1551631	3	501049347	491308789	241576523	3182.07
IMR90, in-situ MboI	GSM1551599 GSM1551600 GSM1551601 GSM1551602 GSM1551603 GSM1551604 GSM1551605	7	1535222082	1216758037	607912681	8007.49
K562, in-situ MboI	GSM1551618 GSM1551619 GSM1551620 GSM1551621 GSM1551622 GSM1551623	6	1210099026	983448759	505046341	6652.52
KBM7, in-situ MboI	GSM1551624 GSM1551625 GSM1551626 GSM1551627 GSM1551628	5	1068897928	978216371	357563947	4709.87
NHEK, in-situ MboI	GSM1551614 GSM1551615 GSM1551616	3	1073207572	759491508	276387959	3640.61
RWPE1 prostate epithelial cell line, ERG overexpression	GSM927075 GSM927077 GSM927078 GSM927079 GSM927080	5	158523370	92645420	22852375	301.014
RWPE1 prostate epithelial cell line, control	GSM927076 GSM927081 GSM927082 GSM927083 GSM927084	5	159213473	94219609	29389544	387.122
HEK293, TEV treated	GSM1081526 GSM1081527	2	818909806	367794487	103061158	1357.53
HEK293, HRV treated	GSM1081528 GSM1081529	2	1013769470	411324431	102502522	1350.17
HEK293 siRNA Control	GSM1081530 GSM1081531	2	738147740	376639033	183316438	2414.66
HEK293 siRNA CTCF	GSM1081532; GSM1081533	2	925974346	492213287	210200033	2768.78
MCF-10A	GSM1631184	1	289975071	237023716	19912735	262.293
MCF-7	GSM1631185	1	286286296	243325603	13963680	183.931
MCF-10A scramble shRNA	GSM1930751 GSM1930752	2	206503892	96249275	8974512	118.213
MCF-10A BRG1 shRNA	GSM1930753 GSM1930754	2	265434339	177530672	13825052	182.105
MCF-7 non-specific shRNA	GSM1942100 GSM1942101	2	362651636	306338151	24384530	321.196
MCF-7 RUNX1 shRNA	GSM1942102 GSM1942103	2	370021856	307434349	22083663	290.888
KBM7 cell line	GSM1709920 GSM1709921	2	560643081	490851125	94446985	1244.07
A549 Cell Line	ENCLB222WYT ENCLB571HTP	2	251891733	165896728	58030418	764.383
Caki2 Cell Line	ENCLB555CZE ENCLB858SVS	2	323731060	242012829	64772236	853.187
G401 Cell Line	ENCLB506SDM ENCLB589RBY	2	340927844	217002083	91765346	1208.74
NCI-H460 Cell Line	ENCLB104ZTM ENCLB118KAE	2	313205689	192129139	63478466	836.145
LNCaP Cell Line	ENCLB191OGC ENCLB473XWD	2	306489193	197293828	27869738	367.103
Panc1 Cell Line	ENCLB134IVX ENCLB951HSJ	2	288978052	241510959	66461170	875.434
RPMI-7951 Cell Line	ENCLB016TGU ENCLB210AAY	2	335883359	224000442	73885248	973.224
SK-MEL-5 Cell Line	ENCLB296ZFT ENCLB462TWE	2	303482692	120798171	47634073	627.441
SK-N-DZ Cell Line	ENCLB524GGK ENCLB952BSP	2	291853821	194878027	20513203	270.202
SK-N-MC Cell Line	ENCLB215KZO ENCLB914GYK	2	313811254	210336501	33318482	438.875
T47D Cell Line	ENCLB183QHG ENCLB758KFU	2	247702528	167896472	64732591	852.665
Astrocyte from cerebellum	ENCLB672PAB ENCLB174TEA	2	715071720	448934815	247494551	3260.02
endothelial cell of hepatic sinusoid	ENCLB284TIY ENCLB618NVM	2	730217738	475512274	270772349	3566.64
Total (Used for downstream processing)		315	65888164606	42594521674	11405454556	1877.92
normal forearm skin fibroblast	GSM1023732 GSM1023733	2	150982984	125589971	3746430	49.3484
progeria patient skin fibroblast	GSM1023734 GSM1023735	2	267655424	204836566	7681963	101.188
MCF-7 estrogen 0h	GSM1250485 GSM1250486 GSM1250487 GSM1250488	4	124715041	33108964	193256	2.54559
MCF-7 estrogen 0.5h	GSM1250489 GSM1250490 GSM1250491 GSM1250492	4	133831228	35786204	298404	3.93061
MCF-7 estrogen 1h	GSM1250493 GSM1250494 GSM1250495 GSM1250496	4	111722633	28185568	486008	6.40175
MCF-7 estrogen 4h	GSM1250497 GSM1250498 GSM1250499 GSM1250500	4	118927169	23017275	664916	8.75834
MCF-7 estrogen 24h	GSM1250501 GSM1250502 GSM1250503 GSM1250504	4	95599507	15627388	109630	1.44406
GM12878, in-situ HiC, HindIII	GSM1551729	1	874727	601994	295645	3.89427
GM12878, dillution HiC, MspI	GSM1551665 GSM1551678	2	5499357	4598451	3863813	50.8946
Acute Lymphoma (B-ALL)	GSM1906333	1	38944371	30502956	13941248	183.636
B-cell precursor leukemia (CALL-4)	GSM1906334	1	78937761	25129380	3796148	50.0033
follicular lymphoma (RL)	GSM1906332	1	32789936	15466219	4688998	61.764
Total (Collected)		345	67048644744	43136972610	11445221015	1638.67

## Sheet: Table S2 ChIP seq Statistics
Sample	Histnoe marker	Accession ID	Raw read count	PCR duplicate removed read count	Non-Redundant Fraction	Have corresponding Input control	Usable Read Depth	Read Length
A549 00h 100 nM dexamethasone	H3K27ac	ENCSR783SNV	116761911	88758230	0.760164	TRUE	HIGH	HIGH
A549 00h 100 nM dexamethasone	H3K4me1	ENCSR636PIN	120844232	97994138	0.810913	TRUE	HIGH	HIGH
A549 00h 100 nM dexamethasone	H3K4me3	ENCSR203XPU	120574192	86452965	0.717011	TRUE	HIGH	HIGH
A549 01h 100 nM dexamethasone	H3K27ac	ENCSR242TBH	105882816	82019663	0.774627	TRUE	HIGH	HIGH
A549 01h 100 nM dexamethasone	H3K4me1	ENCSR537FVU	127511546	103432358	0.811161	TRUE	HIGH	HIGH
A549 01h 100 nM dexamethasone	H3K4me3	ENCSR928FDN	98883441	72885929	0.737089	TRUE	HIGH	HIGH
A549 04h 100 nM dexamethasone	H3K27ac	ENCSR543ZVZ	106130433	83491238	0.786685	TRUE	HIGH	HIGH
A549 04h 100 nM dexamethasone	H3K4me1	ENCSR949IDI	120322641	98272457	0.816741	TRUE	HIGH	HIGH
A549 04h 100 nM dexamethasone	H3K4me3	ENCSR901AAW	90616778	72765953	0.803008	TRUE	HIGH	HIGH
A549 08h 100 nM dexamethasone	H3K27ac	ENCSR250EHC	66229473	54303280	0.819926	TRUE	HIGH	HIGH
A549 08h 100 nM dexamethasone	H3K4me1	ENCSR404OLV	110445000	89739841	0.81253	TRUE	HIGH	HIGH
A549 08h 100 nM dexamethasone	H3K4me3	ENCSR618MUP	87462568	67675380	0.773764	TRUE	HIGH	HIGH
A549 12h 100 nM dexamethasone	H3K27ac	ENCSR435JKM	107519727	84732935	0.788069	TRUE	HIGH	HIGH
A549 12h 100 nM dexamethasone	H3K4me1	ENCSR529YKU	103554379	81027026	0.782459	TRUE	HIGH	HIGH
A549 12h 100 nM dexamethasone	H3K4me3	ENCSR944WVU	128355885	90731700	0.706876	TRUE	HIGH	HIGH
Adrenal gland	H3K27ac	SRX190763	47483756	9890432	0.208291	TRUE	LOW	ACCEPTABLE
Adrenal gland	H3K27me3	SRX342272	38577828	29228957	0.757662	TRUE	ACCEPTABLE	ACCEPTABLE
Adrenal gland	H3K36me3	SRX213917	17177209	11028294	0.642031	TRUE	LOW	ACCEPTABLE
Adrenal gland	H3K4me1	SRX213925	16337955	11755119	0.719498	TRUE	LOW	ACCEPTABLE
Adrenal gland	H3K4me3	SRX342277	24508373	18210076	0.743014	TRUE	ACCEPTABLE	ACCEPTABLE
Aorta	H3K27ac	SRX134730	44717094	20115270	0.449834	TRUE	HIGH	ACCEPTABLE
Aorta	H3K27me3	SRX136951	43425143	15856036	0.365135	TRUE	LOW	ACCEPTABLE
Aorta	H3K36me3	SRX136957	45121042	28933391	0.641239	TRUE	ACCEPTABLE	ACCEPTABLE
Aorta	H3K4me1	SRX190787	34269598	15524151	0.453001	TRUE	LOW	ACCEPTABLE
Aorta	H3K4me3	SRX342280	28718595	20842648	0.725754	TRUE	HIGH	ACCEPTABLE
Bladder	H3K27ac	SRX190770	32540337	17273492	0.530833	TRUE	ACCEPTABLE	ACCEPTABLE
Bladder	H3K36me3	SRX213919	33680464	16324700	0.484693	TRUE	LOW	ACCEPTABLE
Bladder	H3K4me1	SRX213928	21013115	11745187	0.558946	TRUE	LOW	ACCEPTABLE
Bladder	H3K4me3	SRX342281	26986681	19323597	0.716042	TRUE	ACCEPTABLE	ACCEPTABLE
GM12878 (ENCODE)	H2AFZ	SRX067518	46212368	28403042	0.61462	TRUE	HIGH	ACCEPTABLE
GM12878 (ENCODE)	H3K27ac	SRX067522	36793809	14524451	0.394753	TRUE	ACCEPTABLE	ACCEPTABLE
GM12878 (ENCODE)	H3K27me3	SRX067509	85000201	54066988	0.636081	TRUE	HIGH	ACCEPTABLE
GM12878 (ENCODE)	H3K36me3	SRX067430	36623663	20787252	0.567591	TRUE	ACCEPTABLE	ACCEPTABLE
GM12878 (ENCODE)	H3K4me1	SRX067523	129062191	68983404	0.534497	TRUE	HIGH	ACCEPTABLE
GM12878 (ENCODE)	H3K4me3	SRX067459	106350932	49737107	0.46767	TRUE	HIGH	ACCEPTABLE
GM12878 (ENCODE)	H3K9ac	SRX067428	27534541	15954840	0.579448	TRUE	ACCEPTABLE	ACCEPTABLE
H1 Embroynic Stem Cell	H3K27ac	SRX056722	26900401	12835624	0.477154	TRUE	ACCEPTABLE	ACCEPTABLE
H1 Embroynic Stem Cell	H3K36me3	SRX012371	61295934	15559285	0.253839	TRUE	LOW	ACCEPTABLE
H1 Embroynic Stem Cell	H3K4me1	SRX027861	17207086	9260071	0.538155	TRUE	LOW	ACCEPTABLE
H1 Embroynic Stem Cell	H3K4me3	SRX027864	20360983	12750897	0.626242	TRUE	ACCEPTABLE	ACCEPTABLE
H1 Mesenchymal Stem Cell	H3K27ac	SRX081174	43979839	26558216	0.603873	TRUE	HIGH	ACCEPTABLE
H1 Mesenchymal Stem Cell	H3K36me3	SRX081214	152695649	82368276	0.539428	TRUE	HIGH	ACCEPTABLE
H1 Mesenchymal Stem Cell	H3K4me1	SRX081219	166228319	88380390	0.531681	TRUE	HIGH	ACCEPTABLE
H1 Mesenchymal Stem Cell	H3K4me3	SRX081225	323661096	151075183	0.46677	TRUE	HIGH	ACCEPTABLE
H1 Mesendoderm Cell	H3K27ac	SRX084984	132423336	65259469	0.492809	TRUE	HIGH	ACCEPTABLE
H1 Mesendoderm Cell	H3K36me3	SRX081155	98120965	39099843	0.398486	TRUE	ACCEPTABLE	ACCEPTABLE
H1 Mesendoderm Cell	H3K4me1	SRX081158	67849288	37944002	0.55924	TRUE	ACCEPTABLE	ACCEPTABLE
H1 Mesendoderm Cell	H3K4me3	SRX084992	25502005	13114505	0.514254	TRUE	ACCEPTABLE	ACCEPTABLE
H1 Neuronal Progenitor Cell	H3K27ac	SRX084986	55990642	32503443	0.580516	TRUE	HIGH	ACCEPTABLE
H1 Neuronal Progenitor Cell	H3K36me3	SRX101237	145107523	90826090	0.625923	TRUE	HIGH	ACCEPTABLE
H1 Neuronal Progenitor Cell	H3K4me1	SRX101242	139885420	94321015	0.674273	TRUE	HIGH	ACCEPTABLE
H1 Neuronal Progenitor Cell	H3K4me3	SRX084994	128383663	74935689	0.583686	TRUE	HIGH	ACCEPTABLE
H1 Trophectoderm Cell	H3K27ac	SRX081148	43205801	17742405	0.410649	TRUE	ACCEPTABLE	ACCEPTABLE
H1 Trophectoderm Cell	H3K36me3	SRX081153	55988885	29624497	0.529114	TRUE	ACCEPTABLE	ACCEPTABLE
H1 Trophectoderm Cell	H3K4me1	SRX081156	40615957	25777850	0.634673	TRUE	ACCEPTABLE	ACCEPTABLE
H1 Trophectoderm Cell	H3K4me3	SRX081161	39179028	21027110	0.536693	TRUE	HIGH	ACCEPTABLE
H9 Embryonic Stem Cell	H3K27ac	SRX027485	21842457	13579961	0.621723	TRUE	ACCEPTABLE	ACCEPTABLE
H9 Embryonic Stem Cell	H3K27me3	SRX027484	15925532	10688842	0.671176	TRUE	LOW	ACCEPTABLE
H9 Embryonic Stem Cell	H3K4me1	SRX027486	20467865	13121131	0.64106	TRUE	LOW	ACCEPTABLE
H9 Embryonic Stem Cell	H3K4me3	SRX027487	17211980	11162672	0.648541	TRUE	ACCEPTABLE	ACCEPTABLE
H9-derived Neuro-Ectodermal Cell	H3K27ac	SRX027493	36175605	24978195	0.690471	TRUE	HIGH	ACCEPTABLE
H9-derived Neuro-Ectodermal Cell	H3K27me3	SRX027492	35145045	20625738	0.586875	TRUE	ACCEPTABLE	ACCEPTABLE
H9-derived Neuro-Ectodermal Cell	H3K4me1	SRX027494	34520450	21336802	0.618092	TRUE	ACCEPTABLE	ACCEPTABLE
H9-derived Neuro-Ectodermal Cell	H3K4me3	SRX027495	33759917	18456610	0.546702	TRUE	ACCEPTABLE	ACCEPTABLE
HEK293 Cell Line	H3K27ac	ENCSR000FCH	24061417	17846842	0.74172	TRUE	ACCEPTABLE	ACCEPTABLE
HEK293 Cell Line	H3K36me3	ENCSR000FCK	51714874	35073462	0.678208	TRUE	ACCEPTABLE	ACCEPTABLE
HEK293 Cell Line	H3K4me1	ENCSR000FCG	44092047	33771352	0.765928	TRUE	ACCEPTABLE	ACCEPTABLE
HEK293 Cell Line	H3K4me3	ENCSR000DTU	52531151	31601357	0.601574	TRUE	HIGH	ACCEPTABLE
HMEC (ENCODE)	H2AFZ	SRX186696	43083988	30955058	0.718482	TRUE	HIGH	ACCEPTABLE
HMEC (ENCODE)	H3K27ac	SRX067411	33243822	17785185	0.534992	TRUE	ACCEPTABLE	ACCEPTABLE
HMEC (ENCODE)	H3K27me3	SRX067473	26015403	14244570	0.547544	TRUE	LOW	ACCEPTABLE
HMEC (ENCODE)	H3K36me3	SRX067458	29017812	16277814	0.560959	TRUE	LOW	ACCEPTABLE
HMEC (ENCODE)	H3K4me1	SRX067456	50790210	27843961	0.548215	TRUE	ACCEPTABLE	ACCEPTABLE
HMEC (ENCODE)	H3K4me3	SRX067463	49635576	20587402	0.414771	TRUE	HIGH	ACCEPTABLE
HMEC (ENCODE)	H3K9ac	SRX067464	35776889	12429826	0.347426	TRUE	ACCEPTABLE	ACCEPTABLE
HUVEC (ENCODE)	H2AFZ	SRX186752	65072840	45982853	0.706637	TRUE	HIGH	ACCEPTABLE
HUVEC (ENCODE)	H3K27ac	SRX067442	45076784	19033304	0.422242	TRUE	ACCEPTABLE	ACCEPTABLE
HUVEC (ENCODE)	H3K27me3	SRX067439	44855935	18676298	0.416362	TRUE	LOW	ACCEPTABLE
HUVEC (ENCODE)	H3K36me3	SRX067508	37636362	15496936	0.411754	TRUE	LOW	ACCEPTABLE
HUVEC (ENCODE)	H3K4me1	SRX067441	53615663	20747920	0.386975	TRUE	ACCEPTABLE	ACCEPTABLE
HUVEC (ENCODE)	H3K4me3	SRX067424	45299685	16444270	0.363011	TRUE	ACCEPTABLE	ACCEPTABLE
HUVEC (ENCODE)	H3K9ac	SRX067486	29087916	12921439	0.44422	TRUE	ACCEPTABLE	ACCEPTABLE
IMR90 (ENCODE)	H2AFZ	ENCSR124DYB	100851621	48314620	0.479066	TRUE	HIGH	ACCEPTABLE
IMR90 (ENCODE)	H3K27ac	ENCSR002YRE	65371743	34821711	0.532672	TRUE	HIGH	ACCEPTABLE
IMR90 (ENCODE)	H3K27me3	ENCSR431UUY	97005180	42658378	0.439754	TRUE	ACCEPTABLE	ACCEPTABLE
IMR90 (ENCODE)	H3K36me3	ENCSR437ORF	72310132	31697508	0.438355	TRUE	ACCEPTABLE	ACCEPTABLE
IMR90 (ENCODE)	H3K4me1	ENCSR831JSP	74024790	45232930	0.611051	TRUE	HIGH	ACCEPTABLE
IMR90 (ENCODE)	H3K4me3	ENCSR087PFU	57230504	22623701	0.395308	TRUE	HIGH	ACCEPTABLE
IMR90 (ENCODE)	H3K9ac	ENCSR219MYH	42371196	19579339	0.462091	TRUE	ACCEPTABLE	ACCEPTABLE
IMR90 fibroblast control	H3K27ac	SRX212190	26151221	14019323	0.536087	TRUE	ACCEPTABLE	ACCEPTABLE
IMR90 fibroblast control	H3K36me3	SRX212192	24904869	14876039	0.597314	TRUE	LOW	ACCEPTABLE
IMR90 fibroblast control	H3K4me1	SRX212186	26421014	15908491	0.602115	TRUE	LOW	ACCEPTABLE
IMR90 fibroblast control	H3K4me3	SRX212188	45802592	21718782	0.474182	TRUE	HIGH	ACCEPTABLE
IMR90 fibroblast TNF-α treated	H3K27ac	SRX212191	23961294	12510446	0.522111	TRUE	ACCEPTABLE	ACCEPTABLE
IMR90 fibroblast TNF-α treated	H3K36me3	SRX212193	30973340	19512060	0.629963	TRUE	LOW	ACCEPTABLE
IMR90 fibroblast TNF-α treated	H3K4me1	SRX212187	22360718	13485650	0.603096	TRUE	LOW	ACCEPTABLE
IMR90 fibroblast TNF-α treated	H3K4me3	SRX212189	31590126	16603232	0.525583	TRUE	ACCEPTABLE	ACCEPTABLE
K562 (ENCODE)	H2AFZ	SRX067537	49702430	33260874	0.6692	TRUE	HIGH	ACCEPTABLE
K562 (ENCODE)	H3K27ac	SRX067407	38561708	14830914	0.384602	TRUE	ACCEPTABLE	ACCEPTABLE
K562 (ENCODE)	H3K27me3	SRX067409	42127779	17684908	0.419792	TRUE	LOW	ACCEPTABLE
K562 (ENCODE)	H3K36me3	SRX067465	44474965	14738545	0.33139	TRUE	LOW	ACCEPTABLE
K562 (ENCODE)	H3K4me1	SRX067443	54759026	17726987	0.323727	TRUE	LOW	ACCEPTABLE
K562 (ENCODE)	H3K4me3	SRX067431	40054527	19267266	0.481026	TRUE	ACCEPTABLE	ACCEPTABLE
K562 (ENCODE)	H3K9ac	SRX067529	48020726	22998754	0.478934	TRUE	HIGH	ACCEPTABLE
Left Ventricle	H3K27ac	SRX135222	59723625	15821490	0.264912	TRUE	ACCEPTABLE	ACCEPTABLE
Left Ventricle	H3K27me3	SRX135223	52591330	19692101	0.374436	TRUE	LOW	ACCEPTABLE
Left Ventricle	H3K36me3	SRX134740	22623437	14938121	0.660294	TRUE	LOW	ACCEPTABLE
Left Ventricle	H3K4me1	SRX134742	32899912	23660050	0.719152	TRUE	ACCEPTABLE	ACCEPTABLE
Left Ventricle	H3K4me3	SRX134744	19889352	11296240	0.567954	TRUE	ACCEPTABLE	ACCEPTABLE
Liver	H3K27me3	SRX342274	32592965	25267726	0.775251	TRUE	ACCEPTABLE	HIGH
Liver	H3K36me3	SRX213920	26154037	14812722	0.566365	TRUE	LOW	HIGH
Liver	H3K4me1	SRX213929	34624516	19318412	0.55794	TRUE	LOW	HIGH
Liver	H3K4me3	SRX342285	37062628	25982885	0.701053	TRUE	HIGH	ACCEPTABLE
Lung	H3K27ac	SRX190760	21208200	1.75642e+07	0.828181	TRUE	ACCEPTABLE	HIGH
Lung	H3K27me3	SRX342270	35668129	27527673	0.771772	TRUE	ACCEPTABLE	ACCEPTABLE
Lung	H3K36me3	SRX213915	28692445	19986853	0.696589	TRUE	LOW	ACCEPTABLE
Lung	H3K4me1	SRX213921	31240835	23635023	0.756543	TRUE	ACCEPTABLE	ACCEPTABLE
Lung	H3K4me3	SRX347275	31633141	21357183	0.675152	TRUE	HIGH	ACCEPTABLE
MCF-7 Cell Line	H2AFZ	ENCSR057MWG	110081592	72848148	0.661765	TRUE	HIGH	ACCEPTABLE
MCF-7 Cell Line	H3K27ac	ENCSR752UOD	258618024	137522568	0.531759	TRUE	HIGH	ACCEPTABLE
MCF-7 Cell Line	H3K27me3	ENCSR761DLU	118533600	66174437	0.558276	TRUE	HIGH	ACCEPTABLE
MCF-7 Cell Line	H3K36me3	ENCSR610IYQ	123583369	73715234	0.596482	TRUE	HIGH	ACCEPTABLE
MCF-7 Cell Line	H3K4me1	ENCSR493NBY	165346262	112128509	0.678144	TRUE	HIGH	ACCEPTABLE
MCF-7 Cell Line	H3K4me3	ENCSR985MIB	64586635	46299299	0.716856	TRUE	HIGH	ACCEPTABLE
MCF-7 Cell Line	H3K9ac	ENCSR056UBA	103591958	40462760	0.390598	TRUE	HIGH	ACCEPTABLE
NHEK (ENCODE)	H2AFZ	SRX186684	84732275	67621884	0.798065	TRUE	HIGH	ACCEPTABLE
NHEK (ENCODE)	H3K27ac	SRX067425	43189715	17745390	0.410871	TRUE	ACCEPTABLE	ACCEPTABLE
NHEK (ENCODE)	H3K27me3	SRX067452	32305690	14071205	0.435564	TRUE	LOW	ACCEPTABLE
NHEK (ENCODE)	H3K36me3	SRX067477	34906722	14144380	0.405205	TRUE	LOW	ACCEPTABLE
NHEK (ENCODE)	H3K4me1	SRX067449	39878904	18822975	0.472003	TRUE	LOW	ACCEPTABLE
NHEK (ENCODE)	H3K4me3	SRX067471	34281276	15209813	0.443677	TRUE	ACCEPTABLE	ACCEPTABLE
NHEK (ENCODE)	H3K9ac	SRX067416	37149530	16010712	0.43098	TRUE	ACCEPTABLE	ACCEPTABLE
Ovary	H3K27ac	SRX157627	40100277	11480711	0.2863	TRUE	ACCEPTABLE	ACCEPTABLE
Ovary	H3K27me3	SRX342271	37065216	29159849	0.786717	TRUE	ACCEPTABLE	ACCEPTABLE
Ovary	H3K36me3	SRX190780	41846776	26304484	0.62859	TRUE	ACCEPTABLE	ACCEPTABLE
Ovary	H3K4me1	SRX190785	43427160	27409058	0.63115	TRUE	ACCEPTABLE	ACCEPTABLE
Ovary	H3K4me3	SRX342278	34188146	25084728	0.733726	TRUE	HIGH	ACCEPTABLE
Pancreas	H3K27me3	SRX342269	30771174	14980314	0.486829	TRUE	LOW	ACCEPTABLE
Pancreas	H3K36me3	SRX270968	28557634	14737965	0.516078	TRUE	LOW	ACCEPTABLE
Pancreas	H3K4me1	SRX190786	47395473	27702944	0.584506	TRUE	ACCEPTABLE	ACCEPTABLE
Pancreas	H3K4me3	SRX190800	43122771	20915161	0.485014	TRUE	HIGH	ACCEPTABLE
prostate adenocarcinoma (PC3)	H3K27ac	SRX539662	19507414	14368725	0.736578	TRUE	ACCEPTABLE	HIGH
prostate adenocarcinoma (PC3)	H3K27me3	SRX539663	19189776	14280905	0.744193	TRUE	LOW	HIGH
prostate adenocarcinoma (PC3)	H3K4me1	SRX539664	25205973	13381065	0.530869	TRUE	LOW	HIGH
prostate adenocarcinoma (PC3)	H3K4me3	SRX539665	46032945	26488684	0.575429	TRUE	HIGH	HIGH
Prostate Epithelial Cells (PrEC)	H3K27ac	SRX539656	23857716	11788179	0.494103	TRUE	ACCEPTABLE	HIGH
Prostate Epithelial Cells (PrEC)	H3K27me3	SRX539657	24361364	17101268	0.701983	TRUE	LOW	HIGH
Prostate Epithelial Cells (PrEC)	H3K4me1	SRX539658	30902129	16777419	0.542921	TRUE	LOW	HIGH
Prostate Epithelial Cells (PrEC)	H3K4me3	SRX539659	55741699	26477448	0.475003	TRUE	HIGH	HIGH
Psoas	H3K27ac	SRX190767	22879643	1.89353e+07	0.827604	TRUE	ACCEPTABLE	HIGH
Psoas	H3K27me3	SRX135224	22289296	8345995	0.37444	TRUE	LOW	HIGH
Psoas	H3K36me3	SRX270967	38695476	19445984	0.502539	TRUE	LOW	HIGH
Psoas	H3K4me1	SRX213922	16732517	11096503	0.66317	TRUE	LOW	HIGH
Psoas	H3K4me3	SRX342275	31939966	22257768	0.696863	TRUE	HIGH	HIGH
Right Atrium	H3K27ac	SRX136948	75926903	23669099	0.311735	TRUE	HIGH	ACCEPTABLE
Right Atrium	H3K27me3	SRX342273	35612124	27055563	0.759729	TRUE	ACCEPTABLE	ACCEPTABLE
Right Atrium	H3K4me1	SRX142122	24616486	17028874	0.691767	TRUE	LOW	ACCEPTABLE
Right Atrium	H3K4me3	SRX342283	32690033	23334367	0.713807	TRUE	HIGH	ACCEPTABLE
Right Ventricle	H3K27ac	SRX190761	29753523	14838620	0.498718	TRUE	ACCEPTABLE	HIGH
Right Ventricle	H3K27me3	SRX347267	31254241	22079826	0.706459	TRUE	ACCEPTABLE	HIGH
Right Ventricle	H3K36me3	SRX190782	24984429	10196506	0.408114	TRUE	LOW	HIGH
Right Ventricle	H3K4me1	SRX213923	20497917	14163074	0.690952	TRUE	LOW	HIGH
Right Ventricle	H3K4me3	SRX342284	24241150	17345703	0.715548	TRUE	ACCEPTABLE	HIGH
Small Bowel	H3K27ac	SRX190768	24065592	11477381	0.476921	TRUE	ACCEPTABLE	HIGH
Small Bowel	H3K27me3	SRX347272	28755635	21053568	0.732155	TRUE	ACCEPTABLE	ACCEPTABLE
Small Bowel	H3K36me3	SRX263903	50224555	26066252	0.518994	TRUE	ACCEPTABLE	ACCEPTABLE
Small Bowel	H3K4me1	SRX263906	59194074	38294291	0.646928	TRUE	ACCEPTABLE	ACCEPTABLE
Small Bowel	H3K4me3	SRX347281	30640674	21714603	0.708686	TRUE	HIGH	ACCEPTABLE
Spleen	H3K27ac	SRX190769	22304063	18914070	0.84801	TRUE	ACCEPTABLE	HIGH
Spleen	H3K27me3	SRX134738	21783963	14605961	0.670491	TRUE	LOW	ACCEPTABLE
Spleen	H3K36me3	SRX136962	31941958	19103628	0.598073	TRUE	LOW	ACCEPTABLE
Spleen	H3K4me1	SRX136968	33937019	21800241	0.642373	TRUE	ACCEPTABLE	ACCEPTABLE
Spleen	H3K4me3	SRX136973	32490579	16083763	0.495029	TRUE	ACCEPTABLE	ACCEPTABLE
Thymus	H3K27ac	SRX190762	37076026	17393586	0.469133	TRUE	ACCEPTABLE	HIGH
Thymus	H3K27me3	SRX342268	36218014	27544534	0.76052	TRUE	ACCEPTABLE	HIGH
Thymus	H3K36me3	SRX190779	45410460	27142169	0.597707	TRUE	ACCEPTABLE	HIGH
Thymus	H3K4me1	SRX213924	21371935	15001420	0.701921	TRUE	LOW	ACCEPTABLE
Thymus	H3K4me3	SRX342276	36112750	25694948	0.71152	TRUE	HIGH	ACCEPTABLE
Total			9604805211	5.65326e+09
